# Supplementary material
Source: publisher site journal article supplement (https://www.dovepress.com/article/328661)
Supplement: Supplementary file 1 [file get_supplementary_file.php]

| **Supplementary Table 1. Real-Time PCR Primers** | |
| --- | --- |
| Name | Sequence 5’ to 3’ |
| KLK3 forward | GATGAAACAGGCTGTGCCG |
| KLK3 reverse | CCTCACAGCTACCCACTGCA |
| KLK3e S1 forward | TGGGACAACTTGCAAACCTG |
| KLK3e S1 reverse | CCAGAGTAGGTCTGTTTTCAATCCA |
| KLK3e S2 forward | AGAATTGCCTCCCAACACTG |
| KLK3e S2 reverse | GGACCCACTCCTCACTCAAA |
| KLK3e S3 forward | GATGTGGGAATGGCCTAAGA |
| KLK3e S3 reverse | GGATTAGGTGGCAAGATGGA |
| KLK3e S4 forward | AGGGTATCACCAGCCCTTCT |
| KLK3e S4 reverse | GAGGATGTCGGCAGCTCTAC |
| KLK3e S5 forward | GCCAGCATCAGCCTTATCTC |
| KLK3e S5 reverse | TACAACCACATCCCCGTTCT |
| KLK3e S6 forward | TTGTGCTTCGGATGAGTTTG |
| KLK3e S6 reverse | CCATTGTTTGATTCCCCATC |
| KLK3e S7 forward | GGTCAGGTTTTGGTTGAGGA |
| KLK3e S7 reverse | TGAGGGAGACAGAGGTGGAT |
| KLK3e S8 forward | GAGGCTGGATGTGAAGGAAC |
| KLK3e S8 reverse | TCAGGATTCCAGCACCTTCT |
| KLK3e S9 forward | CAGGGAGCCTGGAATCATAG |
| KLK3e S9 reverse | AGTGCCTCGTATCTGGGAGA |
| KLK3e AS1 forward | TTTTGTGAATGCTGGCAGAG |
| KLK3e AS1 reverse | TGCACAGCATCCACCTAGAC |
| KLK3e AS2 forward | GACGATCAAATGTGGTCACG |
| KLK3e AS2 reverse | CTCCATCAAATGAGGCCAGT |
| KLK3e AS3 forward | AAATCTGGCAAGGGAGAGGT |
| KLK3e AS3 reverse | GAGTTCCCTGGATGGCAATA |
| KLK3e AS4 forward | TCCGGAACACAGATCTGACA |
| KLK3e AS4 reverse | GAACGGATCACGGGTAAAGA |
| KLK3e AS5 forward | TGGAGGTACCAGGGCTCTTA |
| KLK3e AS5 reverse | GCCAGGAGTTCAAGGCTACA |
| KLK3e AS6 forward | CTGCTTCGGTCTCCCAATAG |
| KLK3e AS6 reverse | TCAGGCTGGTCTCAAACTCC |
| Beta-actin forward | ATTGGCAATGAGCGGTTC |
| Beta-actin reverse | CGTGGATGCCACAGGACT |

| **Supplementary Table 2. Results of qRT-PCR in the clinical samples.** | | | | | | |
| --- | --- | --- | --- | --- | --- | --- |
| Primer | Normal or tumor | Case 1 | Case 2 | Case 3 | Case 4 | Case 5 |
| β-actin | Normal | 27.59 | 28.53 | 26.85 | 24.77 | 25.58 |
| Tumor | 22.89 | 30.45 | 25.21 | 27.54 | 27.82 |
| KLK3 | Normal | 38.46 | 39.00 | 38.02 | 37.19 | 40.00* |
| Tumor | 37.42 | 40.00* | 38.14 | 37.13 | 38.18 |
| AR | Normal | 30.82 | 36.93 | 38.62 | ND | ND |
| Tumor | 38.21 | 29.53 | 34.09 | ND | ND |
| eRNA-S1 | Normal | 31.60 | 29.21 | 28.96 | 30.74 | 29.83 |
| Tumor | 32.19 | 32.53 | 32.40 | 29.31 | 29.19 |
| eRNA-S2 | Normal | 35.79 | 30.99 | 31.00 | 39.83 | 40.00* |
| Tumor | 37.81 | 35.33 | 34.83 | 33.88 | 31.94 |
| eRNA-S3 | Normal | 31.71 | 29.48 | 29.08 | 32.60 | 35.16 |
| Tumor | 31.92 | 33.56 | 30.73 | 29.06 | 33.92 |
| eRNA-S4 | Normal | 31.93 | 29.22 | 29.17 | 31.93 | 35.72 |
| Tumor | 33.14 | 34.41 | 32.41 | 29.21 | 40.00* |
| eRNA-S5 | Normal | 31.12 | 29.17 | 29.18 | 31.76 | ND |
| Tumor | 34.93 | 40.00* | 32.36 | 28.85 | ND |
| eRNA-S6 | Normal | 30.72 | 29.38 | 40.00* | 30.81 | 40.00* |
| Tumor | 31.76 | 34.95 | 32.89 | 29.06 | 29.72 |
| eRNA-S7 | Normal | 30.72 | 28.86 | 32.89 | 30.13 | 32.71 |
| Tumor | 31.62 | 34.44 | 32.04 | 28.24 | 31.51 |
| eRNA-S8 | Normal | 19.18 | 18.00 | 19.46 | 21.51 | 19.45 |
| Tumor | 18.43 | 23.54 | 19.51 | 19.70 | 19.53 |
| eRNA-S9 | Normal | 33.12 | 32.82 | 34.01 | 33.75 | 32.85 |
| Tumor | 33.45 | 35.93 | 34.79 | 35.73 | 34.23 |
| eRNA-AS1 | Normal | ND | ND | 29.38 | ND | 30.43 |
| Tumor | ND | ND | 32.51 | ND | 33.52 |
| eRNA-AS2 | Normal | 31.66 | 29.44 | 29.27 | 30.43 | 30.92 |
| Tumor | 30.80 | 33.03 | 33.87 | 29.47 | 29.16 |
| eRNA-AS3 | Normal | 31.66 | 28.39 | 28.32 | 30.43 | 31.52 |
| Tumor | 33.02 | 33.15 | 31.51 | 28.65 | 40.00* |
| eRNA-AS4 | Normal | 30.17 | 29.98 | 29.21 | 32.08 | ND |
| Tumor | 33.46 | 32.43 | 30.21 | 30.28 | ND |
| eRNA-AS5 | Normal | 34.03 | 32.18 | 33.97 | 35.13 | 33.27 |
| Tumor | 33.24 | 36.99 | 34.61 | 35.12 | 34.39 |
| eRNA-AS6 | Normal | 22.32 | 21.26 | 22.66 | 24.16 | 21.73 |
| Tumor | 21.69 | 25.76 | 22.65 | 22.90 | 22.70 |
| eRNA-AS7 | Normal | 22.27 | 21.34 | 22.65 | 24.27 | 22.03 |
| Tumor | 21.75 | 26.29 | 22.72 | 22.86 | 22.75 |
| eRNA-AS8 | Normal | 32.78 | 32.42 | 33.84 | 33.33 | 33.31 |
| Tumor | 32.56 | 36.42 | 34.50 | 35.20 | 34.77 |
| The numbers in the table indicate Ct value in qRT-PCR analyses. | | | | | | |
| Abbreviation: ND, not detected | | | | | | |
